# Supplementary material
Source: PubMed Central journal article supplement (PMC10094744)

# Supplemental Figure 1

**A**

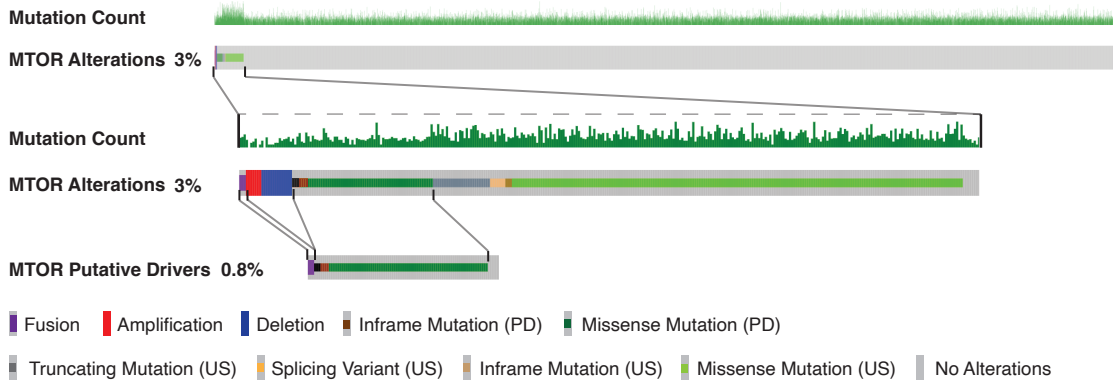

**B**

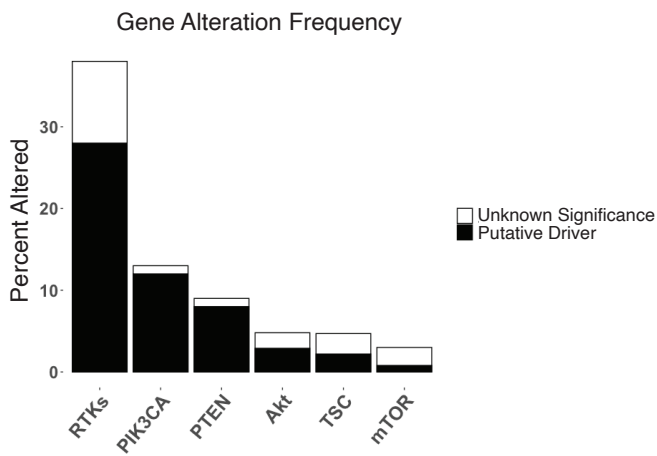

**C**

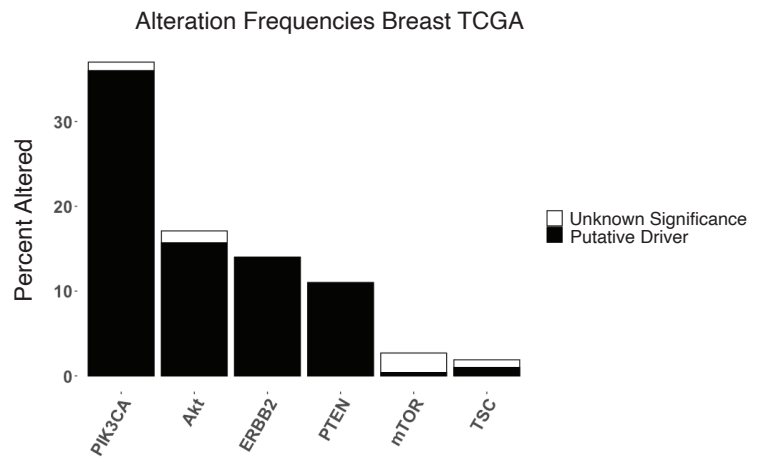

**D**

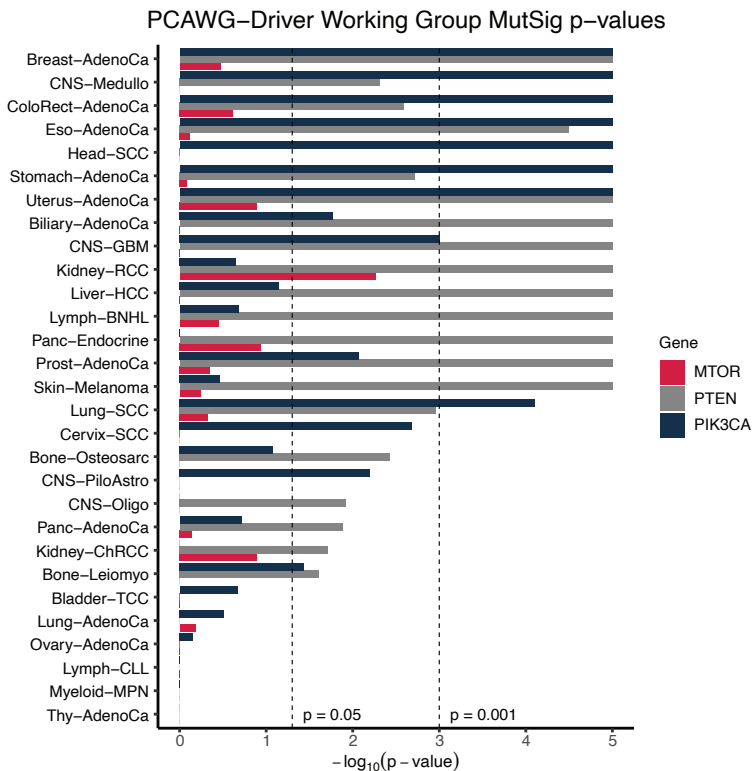

**E**

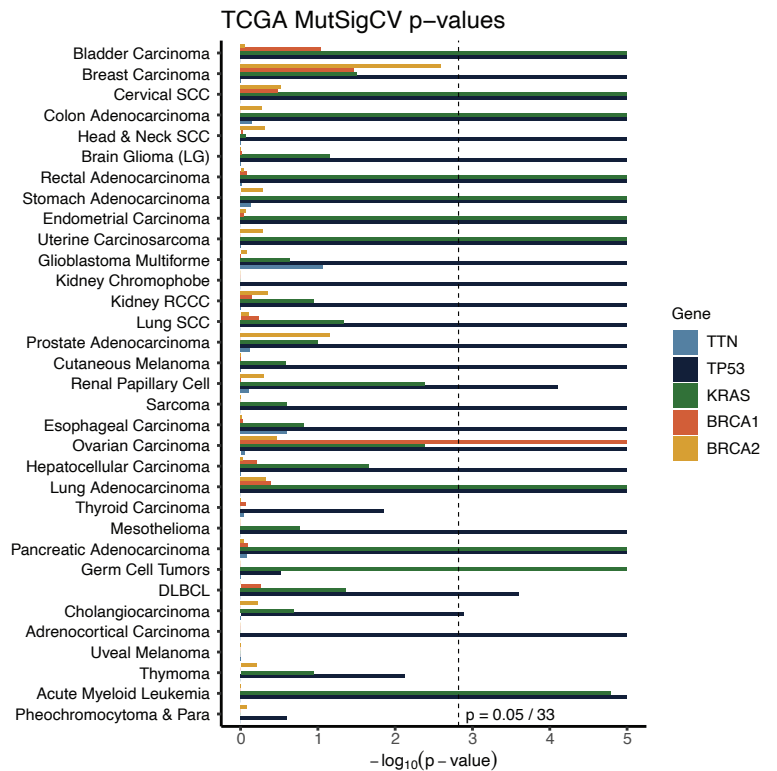

# Supplemental Figure 1

F

Percent Putative Driver mTOR Mutations by Cancer Type

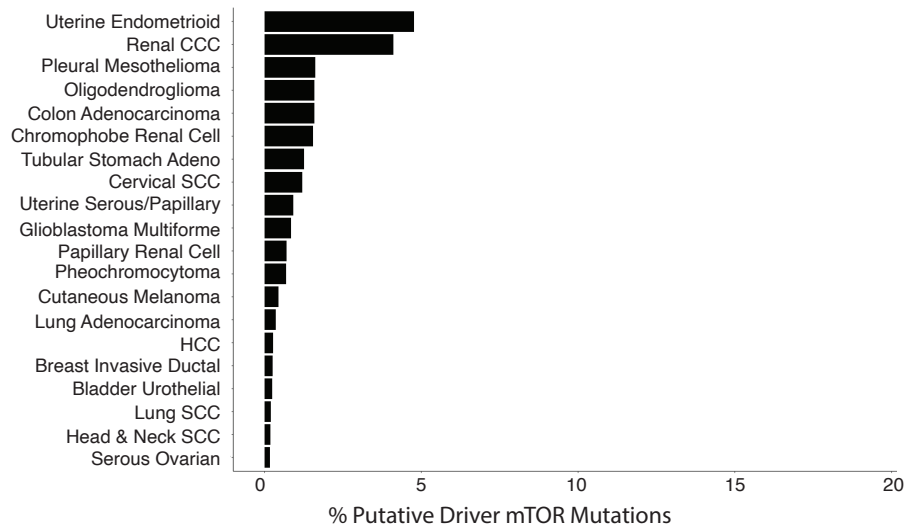

G

mTOR alteration co-occurrence analysis

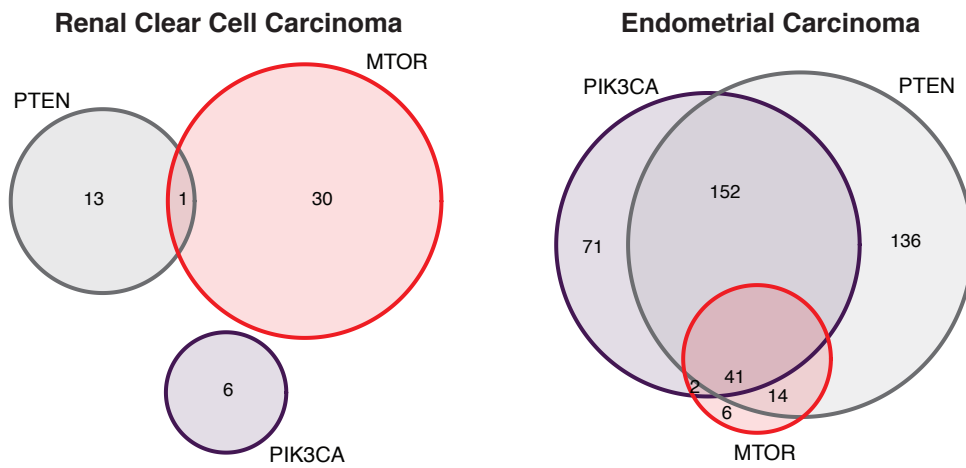

Supplement: NIHMS1865285-supplement-Supplemental_Figure_1.pdf [file NIHMS1865285-supplement-Supplemental_Figure_1.pdf]
