# Supplementary material
Source: PubMed Central journal article supplement (PMC10094744)
Supplement: NIHMS1865285-supplement-Supplemental_Figure_Legend_2.pdf [file NIHMS1865285-supplement-Supplemental_Figure_Legend_2.pdf]

## Supplemental Figure 2:

**A)** Relative cell number of WT MEFs expressing empty vector (control) or expressing mTOR WT or mTOR mutants grown in the absence of glutamine. This represents the relative cell number at d3 over d0, where d0 is the number of cells at the start of treatment. Results are representative of three independent experiments performed in triplicate and are expressed as mean  $\pm$  SD (error bars) of three replicates. **B)** Relative growth of MEF expressing empty vector or myr-Akt in 5% amino acid conditions, with or without the addition of 3% BSA. **C)** Relative growth of MEFs expressing control guide or sgPTEN in 5% amino acids, with or without the addition of 3% BSA. The cell number at indicated days relative to the number at the start of the treatment (d0) is shown. Results are expressed as mean  $\pm$  SD (error bars) of three replicates. Statistical significance is based on one-way ANOVA. p values are as indicated: ns = not significant; \* ,  $p \leq 0.05$ ; \*\* ,  $p \leq 0.01$ ; \*\*\* ,  $p \leq 0.001$ ; \*\*\*\* ,  $p \leq 0.0001$ . **D)** Western blot of WT MEFs with either control mTOR (empty vector), or expressing mTOR WT or activating mTOR mutants cultured in complete or amino acid deficient medium for 24 hrs. This is a representative blot from three independent experiments.
