# Supplementary material
Source: PubMed Central journal article supplement (PMC10094744)
Supplement: NIHMS1865285-supplement-Supplemental_Figure_Legend_3.pdf [file NIHMS1865285-supplement-Supplemental_Figure_Legend_3.pdf]

### Supplemental Figure 3:

Relative cell number of WT MEFs expressing empty vector (control) or expressing mTOR WT or mTOR mutants grown in **A)** 10 mM Glucose, **B)** 1 mM Glucose, **C)** 0.1 mM Glucose, and **D)** 0 mM Glucose. The cell number at indicated days relative to the number at the start of the treatment (d0) is shown. Relative cell number of WT MEFs expressing empty vector (control) or expressing mTOR WT or mTOR mutants treated with **D)** 1% O<sub>2</sub> or **E)** 0.5% O<sub>2</sub> and 5% amino acids. This represents the cell number at d3 over d0, where d0 is the number of cells at the start of treatment. Results are representative of three independent experiments performed in triplicate and are expressed as mean  $\pm$  SD (error bars) of three replicates. Statistical significance is based on one-way ANOVA. p values are as indicated: ns = not significant; \*, p  $\leq$  0.05; \*\*, p  $\leq$  0.01; \*\*\*, p  $\leq$  0.001; \*\*\*\*, p  $\leq$  0.0001.
