# Supplementary material
Source: PubMed Central journal article supplement (PMC10094744)

## Supplemental Figure 2:

**A**

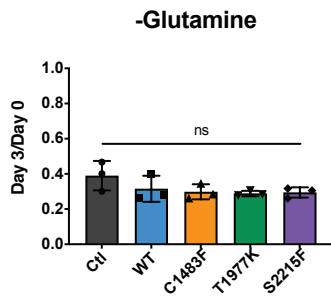

**B**

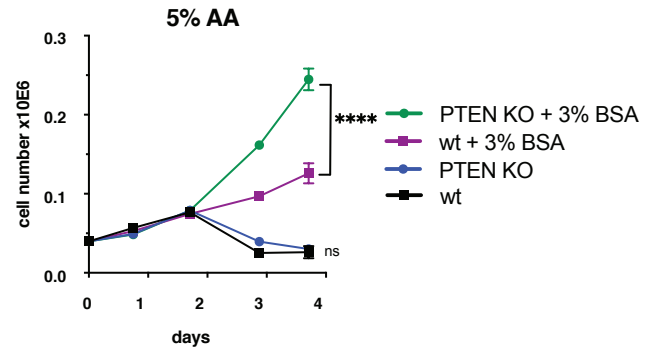

**C**

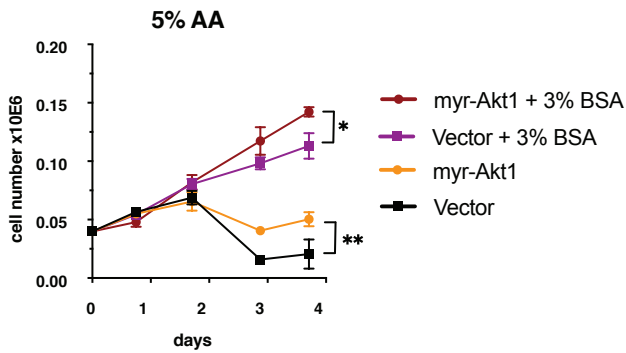

**D**

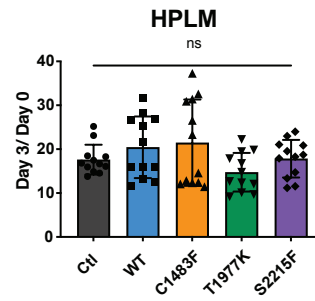

**E**

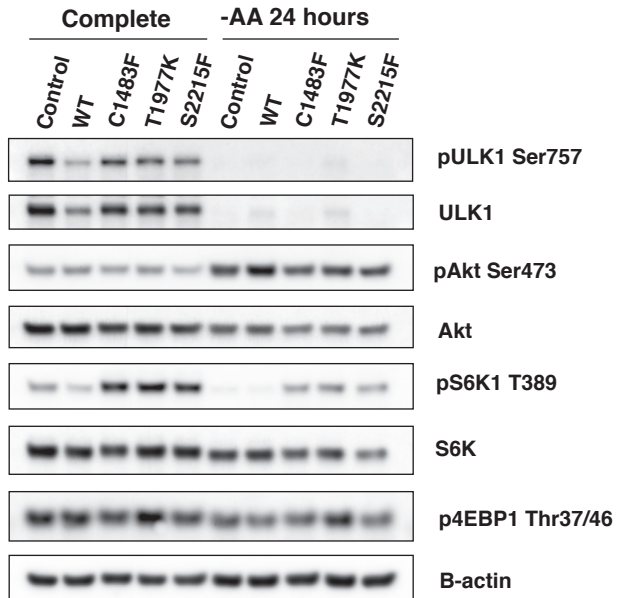

Supplement: NIHMS1865285-supplement-Supplemental_Figure_2.pdf [file NIHMS1865285-supplement-Supplemental_Figure_2.pdf]

# Supplemental Figure 3

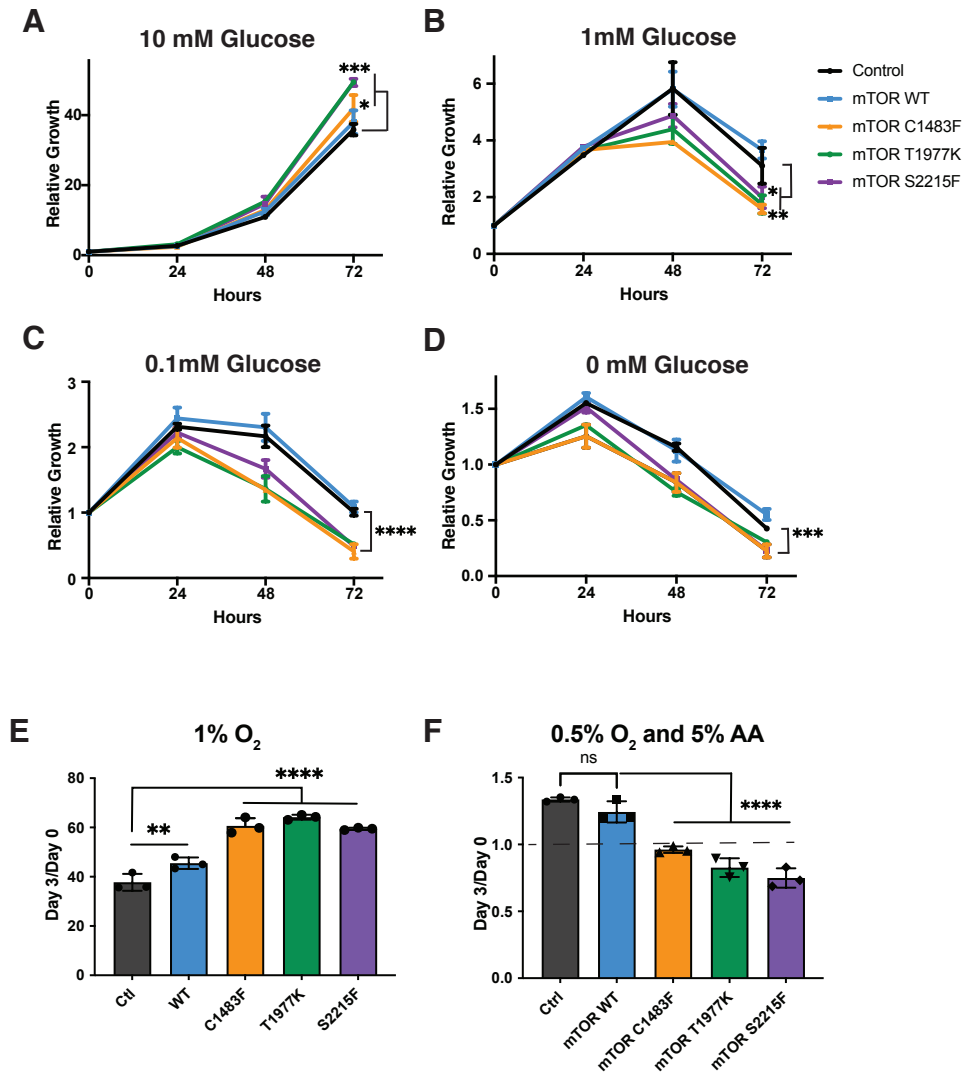

Supplement: NIHMS1865285-supplement-Supplemental_Figure_3.pdf [file NIHMS1865285-supplement-Supplemental_Figure_3.pdf]

# Supplemental Figure 4

**A**

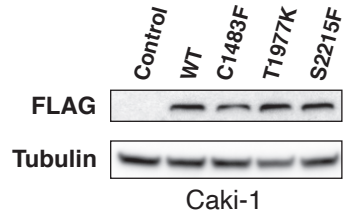

**B**

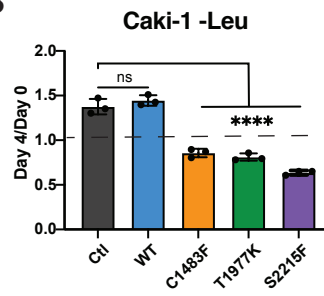

**C**

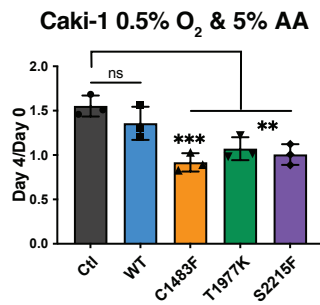

**D**

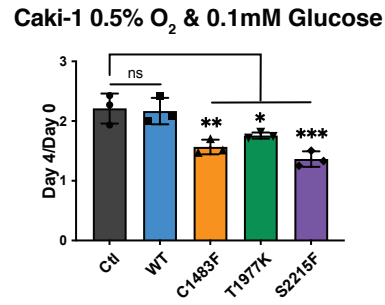

**E**

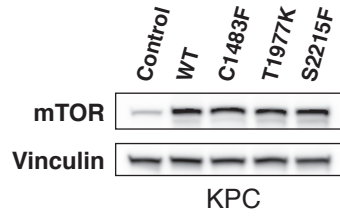

Supplement: NIHMS1865285-supplement-Supplemental_Figure_4.pdf [file NIHMS1865285-supplement-Supplemental_Figure_4.pdf]
